# Supplementary material for: Extremely low frequency pulsed electromagnetic fields cause antioxidative defense mechanisms in human osteoblasts via induction of •O2− and H2O2
Source: PubMed Central journal article supplement (PMC5673962; doi:10.1038/s41598-017-14983-9), 2017-11-06
Supplement: 41598_2017_14983_MOESM1_ESM.pdf [file 41598_2017_14983_MOESM1_ESM.pdf]

# Extremely low frequency pulsed electromagnetic fields cause antioxidative defense mechanisms in human osteoblasts via induction of $\bullet\text{O}_2^-$ and $\text{H}_2\text{O}_2$

Sabrina Ehnert,<sup>1\*</sup> Anne-Kristin Fentz,<sup>2</sup> Anna Schreiner,<sup>1</sup> Johannes Birk,<sup>1</sup> Benjamin Wilbrand,<sup>1</sup> Patrick Ziegler,<sup>1</sup> Marie K. Reumann,<sup>1</sup> Hongbo Wang,<sup>3</sup> Karsten Falldorf,<sup>2</sup> Andreas K. Nussler<sup>1</sup>

## Supplementary Figure 1

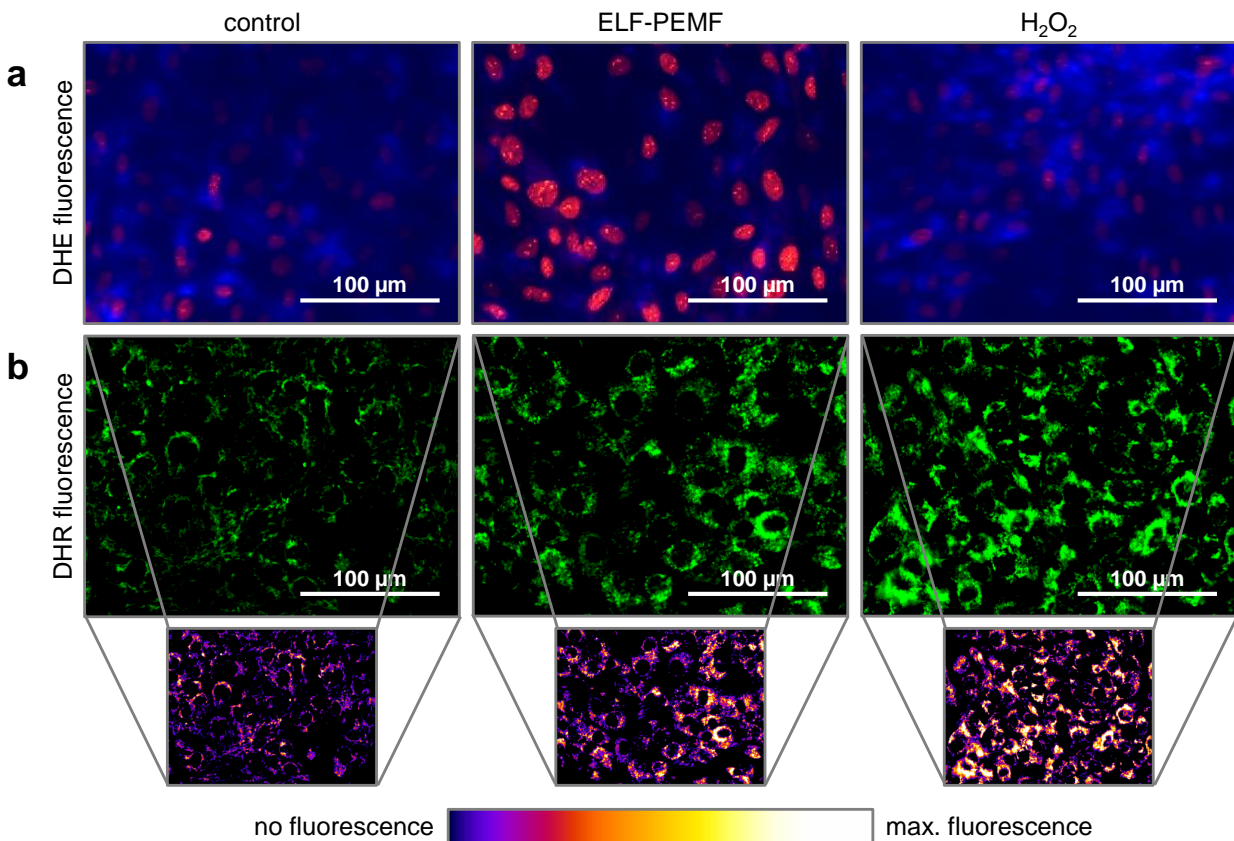

Supplementary Figure 1: Microscopic images of the DHE and DHR assay in hOBs. Directly after single exposure (7 min) to ELF-PEMF intracellular ROS levels were determined in hOBs using different fluorescent probes. (a) DHE assay was used to detect  $\bullet\text{O}_2^-$ . hOBs stimulated with 0.01%  $\text{H}_2\text{O}_2$  were used as negative control to show specificity of the assays. (b) DHR123 assay was used to detect  $\text{H}_2\text{O}_2$ . In these cells stimulation with 0.01%  $\text{H}_2\text{O}_2$  was used as positive control. Staining intensities were visualized by pseudo-color (fire) in ImageJ.
