# Supplementary material for: Extremely low frequency pulsed electromagnetic fields cause antioxidative defense mechanisms in human osteoblasts via induction of •O2− and H2O2
Source: PubMed Central journal article supplement (PMC5673962; doi:10.1038/s41598-017-14983-9), 2017-11-06
Supplement: 41598_2017_14983_MOESM2_ESM.pdf [file 41598_2017_14983_MOESM2_ESM.pdf]

# Extremely low frequency pulsed electromagnetic fields cause antioxidative defense mechanisms in human osteoblasts via induction of $\bullet\text{O}_2^-$ and $\text{H}_2\text{O}_2$

Sabrina Ehnert,<sup>1\*</sup> Anne-Kristin Fentz,<sup>2</sup> Anna Schreiner,<sup>1</sup> Johannes Birk,<sup>1</sup> Benjamin Wilbrand,<sup>1</sup> Patrick Ziegler,<sup>1</sup> Marie K. Reumann,<sup>1</sup> Hongbo Wang,<sup>3</sup> Karsten Falldorf,<sup>2</sup> Andreas K. Nussler<sup>1</sup>

## Supplementary Figure 2

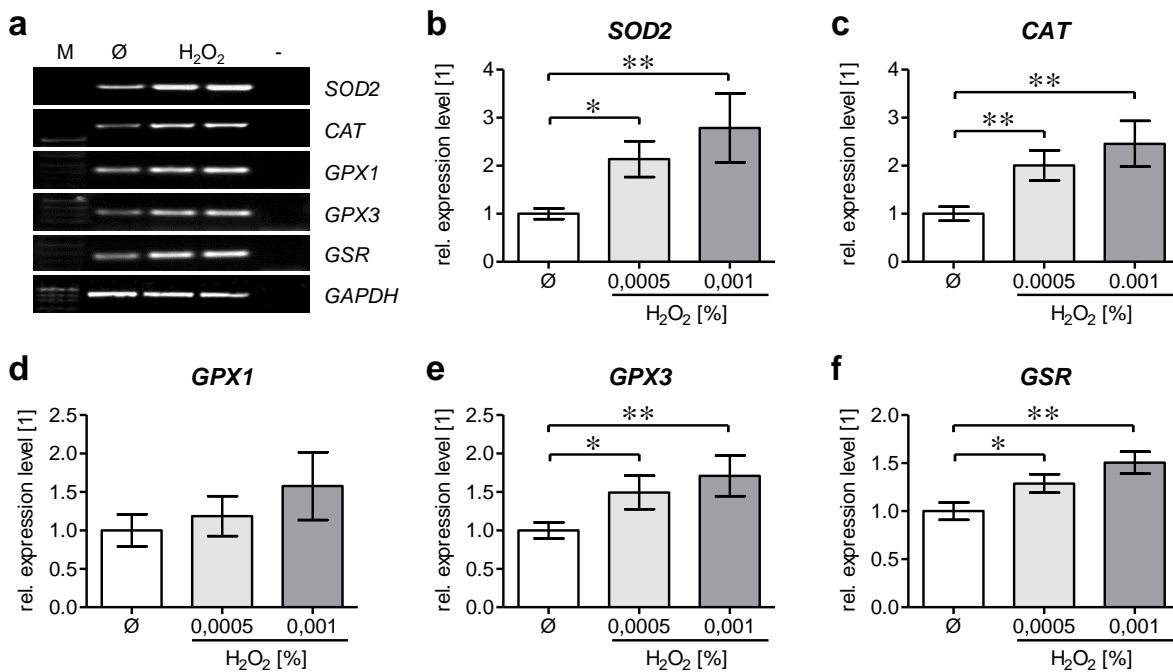

Supplementary Figure 2: H<sub>2</sub>O<sub>2</sub> treatment increases expression of of antioxidative enzymes in hOBs. hOBs were osteogenically differentiated with or without 0.0005% or 0.001% H<sub>2</sub>O<sub>2</sub>. After 2 days mRNA levels of the antioxidative enzymes (*SOD2*, *CAT*, *GPX1*, *GPX3* and *GSR*) were determined by conventional RT-PCR. (a) Representative figure of the RT-PCR products for 1 donor. (b-f) Densitometric analysis (ImageJ software) was performed with individual samples (N = 3) analyzed twice (n = 2) to reduce small loading differences. The mean signal intensity of untreated cells was set as reference. \* p < 0.05 and \*\* p < 0.01 as indicated (Kruskal-Wallis test followed by Dunn's multiple comparison test, α = 0.05).
