# Supplementary material for: Extremely low frequency pulsed electromagnetic fields cause antioxidative defense mechanisms in human osteoblasts via induction of •O2− and H2O2
Source: PubMed Central journal article supplement (PMC5673962; doi:10.1038/s41598-017-14983-9), 2017-11-06
Supplement: 41598_2017_14983_MOESM3_ESM.pdf [file 41598_2017_14983_MOESM3_ESM.pdf]

# Extremely low frequency pulsed electromagnetic fields cause antioxidative defense mechanisms in human osteoblasts via induction of $\bullet\text{O}_2^-$ and $\text{H}_2\text{O}_2$

Sabrina Ehnert,<sup>1\*</sup> Anne-Kristin Fentz,<sup>2</sup> Anna Schreiner,<sup>1</sup> Johannes Birk,<sup>1</sup> Benjamin Wilbrand,<sup>1</sup> Patrick Ziegler,<sup>1</sup> Marie K. Reumann,<sup>1</sup> Hongbo Wang,<sup>3</sup> Karsten Falldorf,<sup>2</sup> Andreas K. Nussler<sup>1</sup>

## Supplementary Figure 3

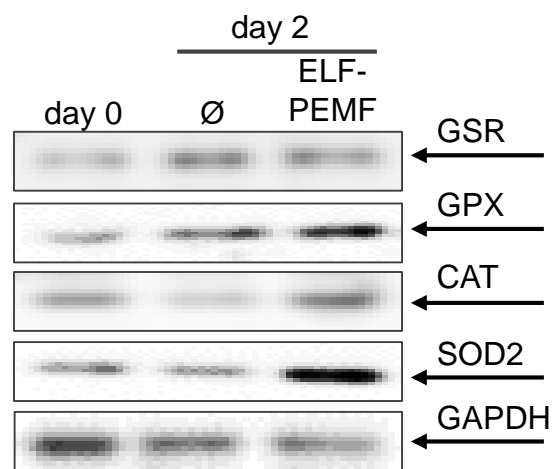

Supplementary Figure 3: ELF-PEMF exposure increases proteins levels of antioxidative enzymes in hOBs. hOBs were osteogenically differentiated with or without daily exposure to ELF-PEMF. After 2 days protein levels of SOD2, CAT, GPXs and GSR were determined by Western blot. Representative figure of Western blot signals for 1 donor.
